# Supplementary material
Source: PubMed Central journal article supplement (PMC3911756)
Supplement: JVI.02689-13_zjv999098495so1.pdf [file JVI.02689-13_zjv999098495so1.pdf]

## Supplemental Information

### Genome-wide mapping and screening of KSHV 3'UTRs identify bicistronic and polycistronic viral transcripts as frequent targets of KSHV microRNAs

Zhiqiang Bai<sup>1,2</sup>, Yufei Huang<sup>3</sup>, Wan Li<sup>1</sup>, Ying Zhu<sup>4</sup>, Jae U. Jung<sup>4</sup>, Chun Lu<sup>1\*</sup>,  
Shou-Jiang Gao<sup>2,4\*</sup>

<sup>1</sup>Department of Immunology and Microbiology, Nanjing Medical University, Nanjing, China

<sup>2</sup>Departments of Pediatrics, University of Texas Health Science Center at San Antonio, San Antonio, TX78229

<sup>3</sup>Department of Electrical and Computer Engineering, University of Texas at San Antonio, San Antonio, TX 78249

<sup>4</sup>Department of Molecular Microbiology and Immunology, Keck School of Medicine, University of Southern California

\* Address correspondence to: [shoujiag@usc.edu](mailto:shoujiag@usc.edu) and [clu@njmu.edu.cn](mailto:clu@njmu.edu.cn)

#### Table of Contents:

**Figure S1. 3'UTRs of ORF-K1, ORF4 and ORF6.**

**Figure S2. 3'UTRs of ORF9, ORF10 and ORF11.**

**Figure S3. 3'UTRs of ORF-K2, ORF2, ORF-K3, ORF70 and ORF-K4.**

**Figure S4. 3'UTRs of ORF-K5, ORF-K6, ORF-K7, ORF16, ORF17 and ORF18.**

**Figure S5. 3'UTRs of ORF19, ORF21, ORF22, ORF23 and ORF24.**

**Figure S6. 3'UTRs of ORF25, ORF26 and ORF27.**

**Figure S7. 3'UTRs of ORF29b, ORF30, ORF31, ORF32 and ORF33.**

**Figure S8. 3'UTRs of ORF34, ORF35, ORF36 and ORF37.**

**Figure S9. 3'UTRs of ORF39, ORF40, ORF41, ORF42, ORF43 and ORF44.**

**Figure S10. 3'UTRs of ORF45, ORF46, ORF47, ORF48 and ORF49.**

**Figure S11. 3'UTRs of ORF52, ORF53, ORF54, ORF55, ORF56, ORF57 and ORF-K9.**

**Figure S12. 3'UTRs of ORF-K10 and ORF-K10.6.**

**Figure S13. 3'UTRs of ORF58, ORF59, ORF60, ORF61 and ORF62.**

**Figure S14. 3'UTRs of ORF64.**

**Figure S15. 3'UTRs of ORF65, ORF66, ORF67, ORF69 and ORF-K12.**

**Figure S16. 3'UTRs of ORF71, ORF72 and ORF73.**

**Figure S17. 3'UTRs of ORF-K14, ORF74 and ORF75.**

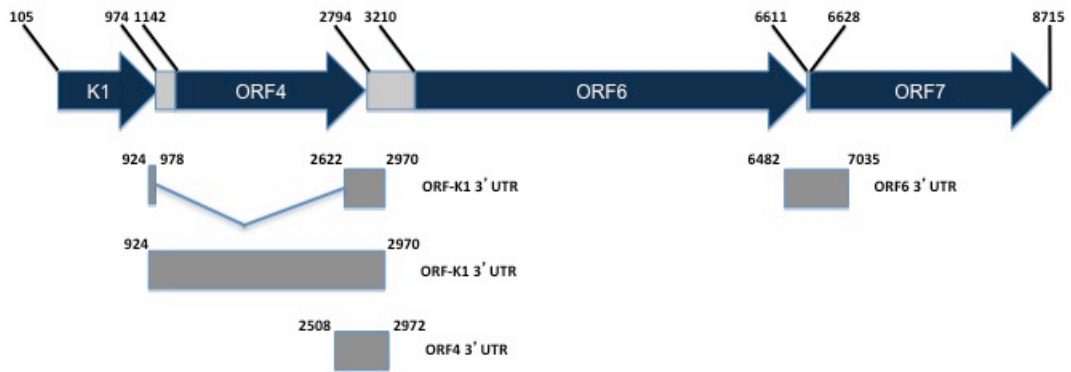

**Figure S1. 3'UTRs of ORF-K1, ORF4 and ORF6.**

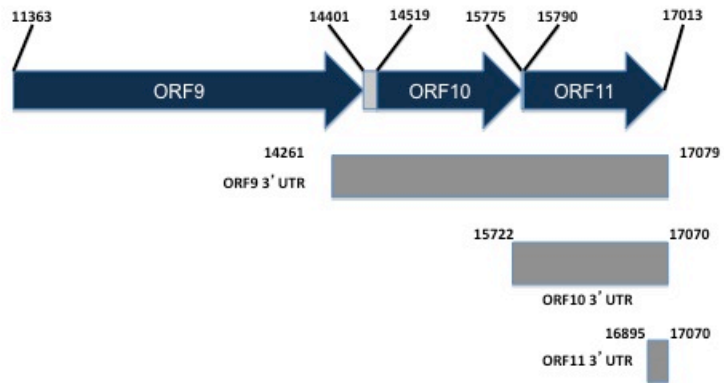

**Figure S2. 3'UTRs of ORF9, ORF10 and ORF11.**

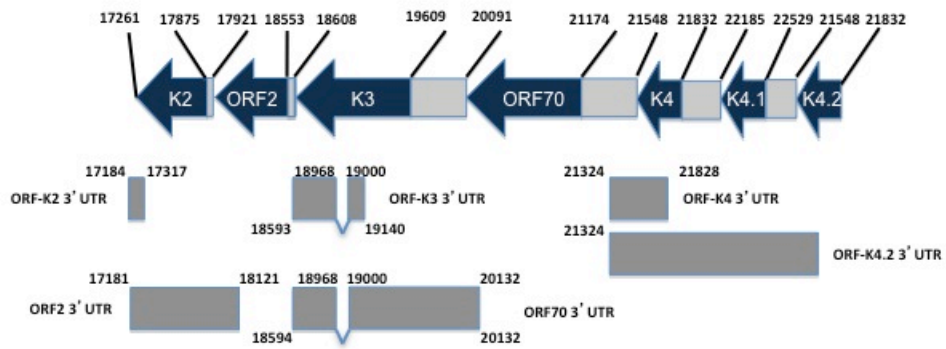

Figure S3. 3'UTRs of ORF-K2, ORF2, ORF-K3, ORF70 and ORF-K4.

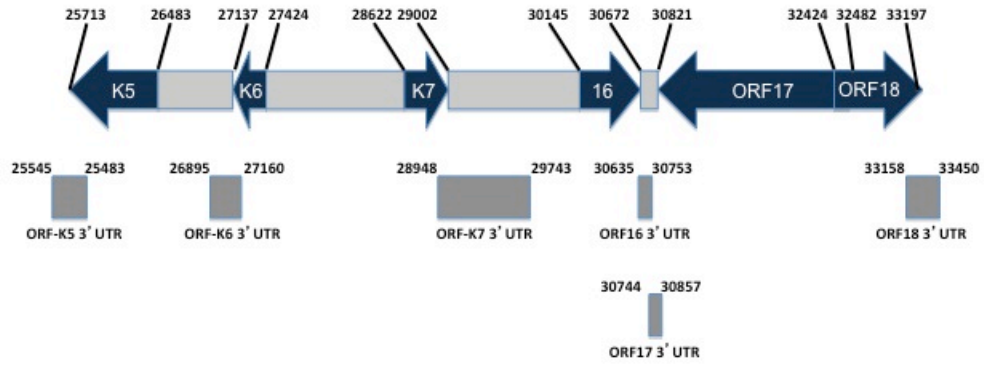

**Figure S4. 3'UTRs of ORF-K5, ORF-K6, ORF-K7, ORF16, ORF17 and ORF18.**

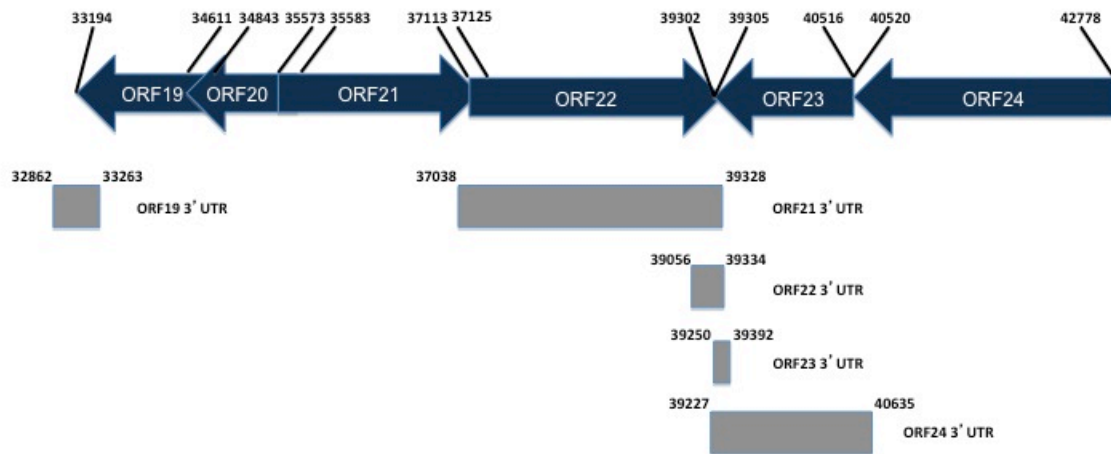

Figure S5. 3'UTRs of ORF19, ORF21, ORF22, ORF23 and ORF24.

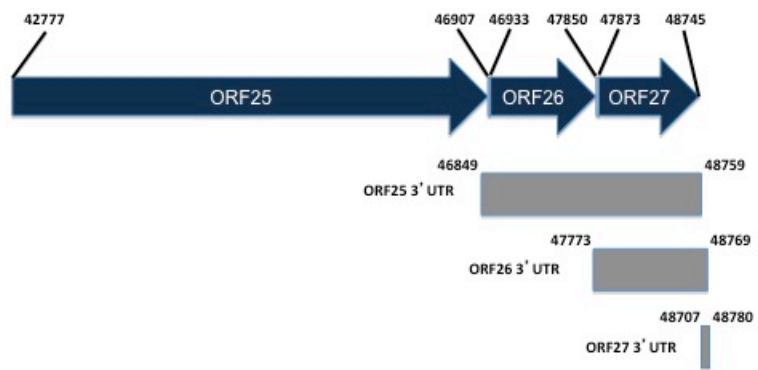

**Figure S6. 3'UTRs of ORF25, ORF26 and ORF27.**

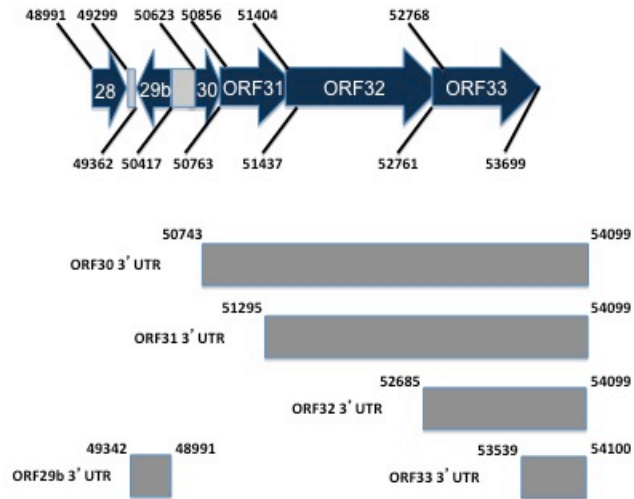

**Figure S7. 3'UTRs of ORF29b, ORF30, ORF31, ORF32 and ORF33.**



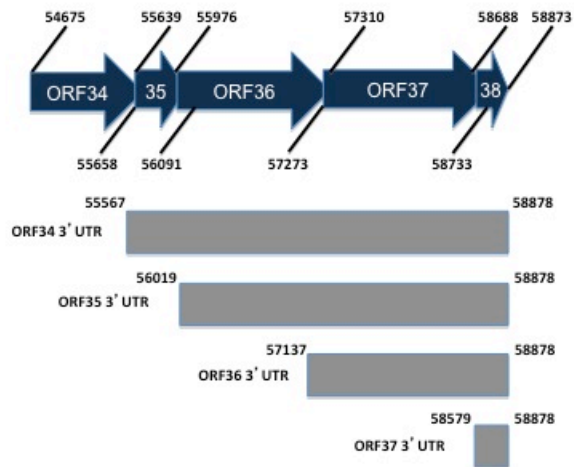

**Figure S8. 3'UTRs of ORF34, ORF35, ORF36 and ORF37.**

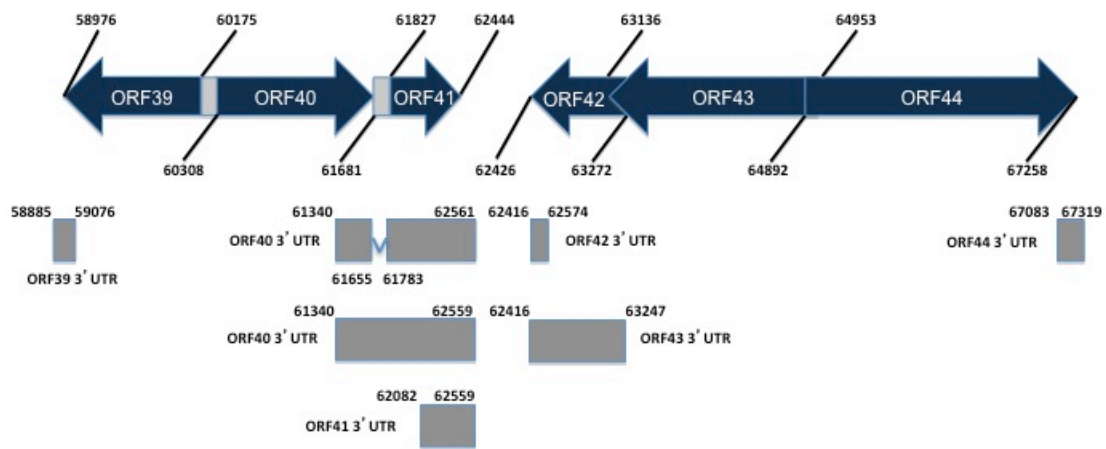

**Figure S9. 3'UTRs of ORF39, ORF40, ORF41, ORF42, ORF43 and ORF44.**

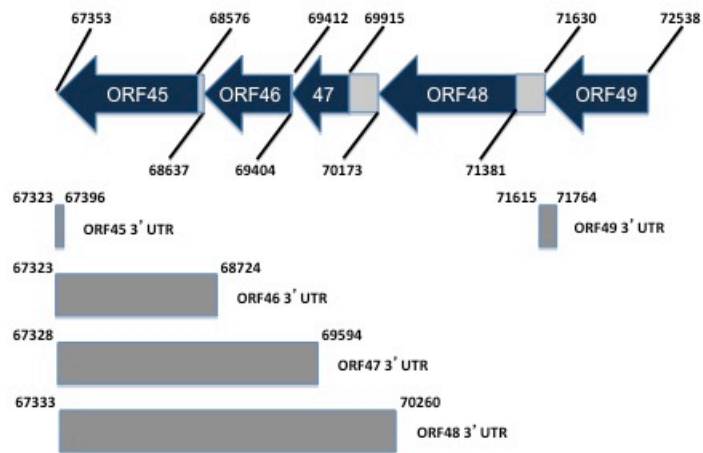

**Figure S10. 3'UTRs of ORF45, ORF46, ORF47, ORF48 and ORF49.**

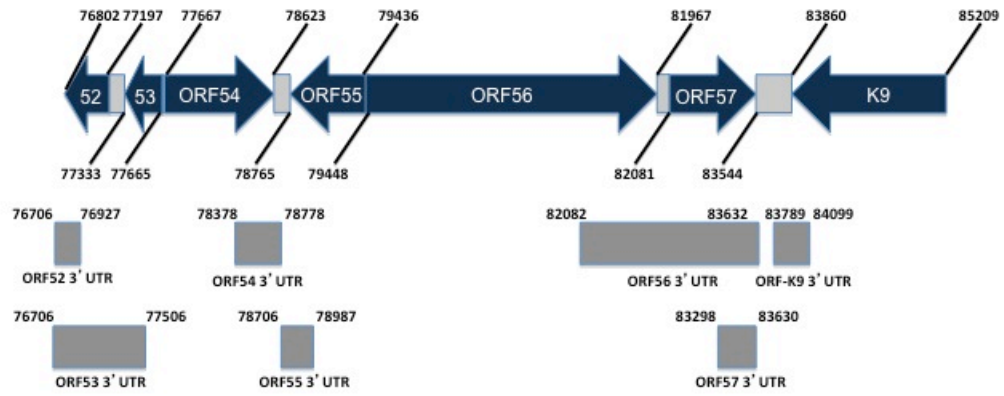

Figure S11. 3'UTRs of ORF52, ORF53, ORF54, ORF55, ORF56, ORF57 and ORF-K9.

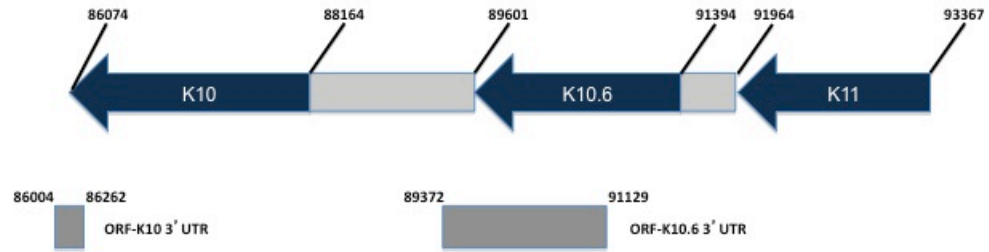

**Figure S12. 3'UTRs of ORF-K10 and ORF-K10.6.**

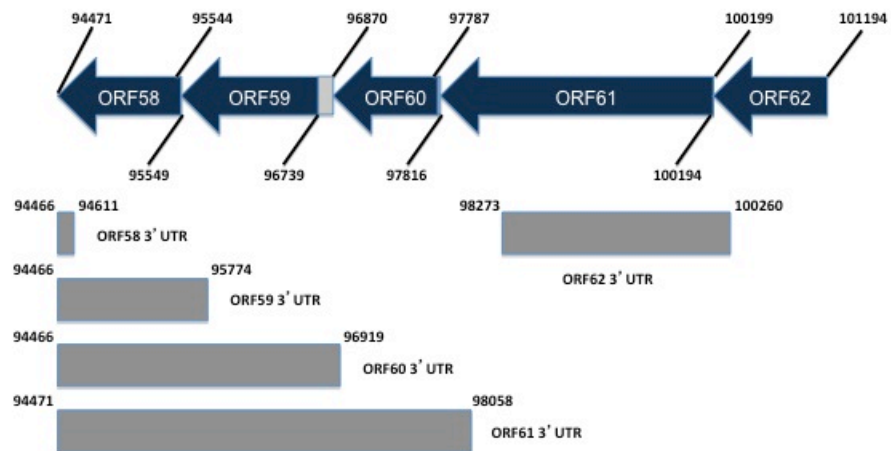

**Figure S13. 3'UTRs of ORF58, ORF59, ORF60, ORF61 and ORF62.**

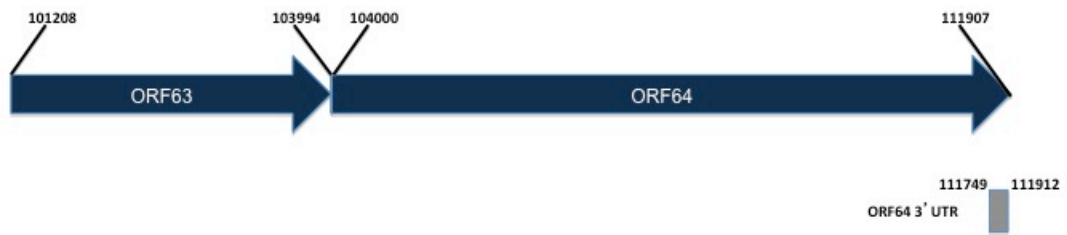

**Figure S14. 3'UTRs of ORF64.**

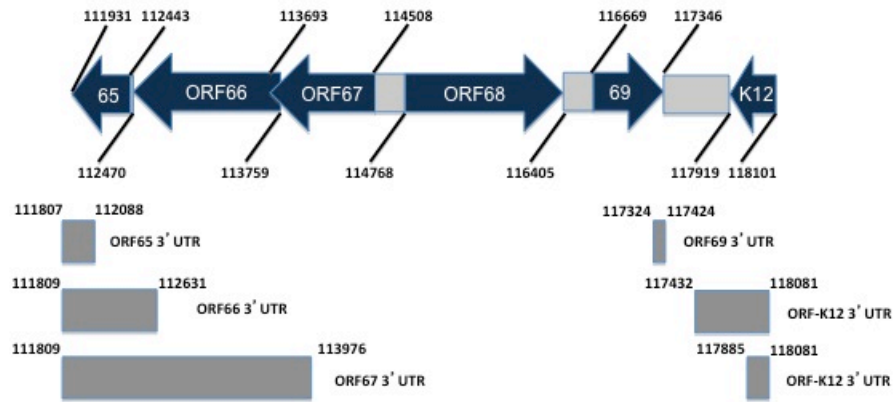

Figure S15. 3'UTRs of ORF65, ORF66, ORF67, ORF69 and ORF-K12.



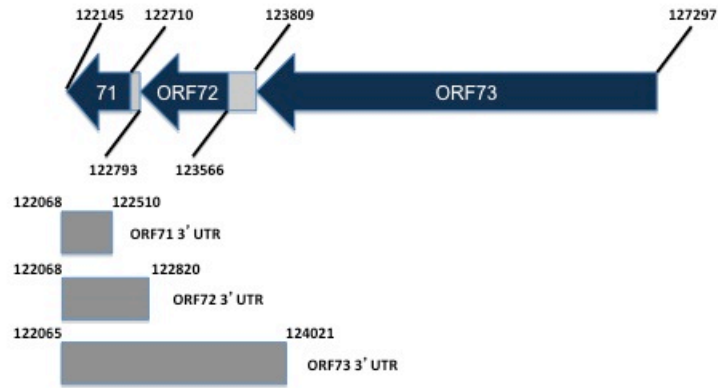

**Figure S16. 3'UTRs of ORF71, ORF72 and ORF73.**

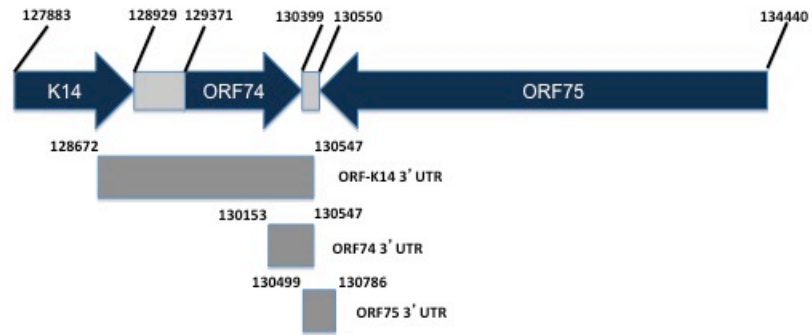

**Figure S17. 3'UTRs of ORF-K14, ORF74 and ORF75.**
